# Supplementary material for: In-stream Escherichia Coli Modeling Using high-temporal-resolution data with deep learning and process-based models
Source: Copernicus journal article supplement (doi:10.5194/hess-2021-98), 2021-04-08
Supplement: Supplementary file 1 [file hess-2021-98-supplement.pdf]

# In-stream *Escherichia Coli* Modeling Using high-temporal-resolution data with deep learning and process-based models

Ather Abbas<sup>1</sup>, Sangsoo Baek<sup>1</sup>, Norbert Silvera<sup>2</sup>, Bounsamay Soullileuth<sup>3</sup>, Yakov  
Pachepsky<sup>4</sup> Olivier Ribolzi<sup>5</sup>, Laurie Boithias<sup>5†</sup>, Kyung Hwa Cho<sup>1†</sup>

<sup>1</sup> School of Urban and Environmental Engineering, Ulsan National Institute of Science  
and Technology, Ulsan, 689-798, Republic of Korea

<sup>2</sup> Institute of Ecology and Environmental Sciences of Paris (iEES-Paris), Sorbonne  
Université, Univ Paris Est Creteil, IRD, CNRS, INRA, Paris, France

<sup>3</sup> IRD, IEES-Paris UMR 242, c/o National Agriculture and Forestry Research Institute,  
Vientiane, Lao PDR

<sup>4</sup> Environmental Microbial and Food Safety Laboratory, USDA-ARS, Beltsville, MD,  
USA

<sup>5</sup> Géosciences Environnement Toulouse, Université de Toulouse, CNRS, IRD, UPS,  
Toulouse, France

<sup>†</sup> Co-corresponding authors: Kyung Hwa Cho ([khcho@unist.ac.kr](mailto:khcho@unist.ac.kr)), Laurie Boithias  
([laurie.boithias@get.omp.eu](mailto:laurie.boithias@get.omp.eu))

A manuscript for  
*Hydrology and Earth System Sciences*

## **Text S1. Study area and land use information**

The 0.6 km<sup>2</sup> catchment is part of the 800000 km<sup>2</sup> Mekong River basin. The catchment is located at an altitude of 435–716 m (Fig. 1) with a slope gradient of 1 %–135 % (mean = 52 %). The closest village is Lak Sip, located downstream of station S4 (Fig. 1), which has 484 inhabitants ([Census of 2015](#)).

The study area can be characterized as subhumid with a monsoon season. The dry season stretches from November to May, whereas the wet season spans from June to October. The annual mean temperature is 23.4 °C, and the annual mean precipitation is 1,366 mm from 2001 to 2019 (Boithias et al., 2021). However, during our study period (i.e., from 2011 to 2018), the mean annual precipitation was 1450 mm. Approximately 71 % of rainfall occurs during the wet season. The subsurface geology predominantly consists of Permian to Upper Carboniferous argillites, siltstones, and fine-grained sandstones. The soils in the study area can be classified as Entisol, Ultisol, and Alfisol, comprising 20 %, 30 %, and 50 %, respectively.

Detailed land-cover surveys and mapping were conducted each year from 2011 to 2018 within the catchment area. The annual areal percentages of fallow, teak trees, annual crops, and forest were calculated using a geospatial information processing software QGIS version 2.6 ([QGIS Development Team, 2016](#)) and denoted “Fallow,” “Teak,” “Annual crop,” and “Forest,” for modeling purposes, respectively. The land-use change for each type of land use is shown in the form of time series in Fig. S1. The area has recently

undergone an increase in teak tree plantations, especially from 2006 to 2013 (Ribolzi et al., 2017). The fallow land use also increased at the expense of annual crops from 2012 to 2016.

## **Text S2. Electrical-conductivity-based hydrograph separation**

We used a tracer-based approach (Collins and Neal, 1998) to separate storm hydrographs into “event water” (infiltration-excess overland flow) and “pre-event water” (groundwater pre-stored in the catchment area). This approach relies on a simple mixing model with two reservoirs and the electrical conductivity of water as a tracer, and it had been previously tested in the study catchment by Ribolzi et al., 2018). The tracer-based approach is described by the following equations:

$$Q = Q_{OF} + Q_{GW}, \quad (1)$$

$$Q \times EC = Q_{OF} \times EC_{OF} + Q_{GW} \times EC_{GW}, \quad (2)$$

where  $Q$  is the instantaneous stream water discharge rate at the catchment outlet ( $\text{m}^3\text{s}^{-1}$ );  $Q_{OF}$  is the instantaneous discharge of overland flow—surface flow ( $\text{m}^3\text{s}^{-1}$ );  $Q_{GW}$  is the instantaneous discharge of groundwater—subsurface flow ( $\text{m}^3\text{s}^{-1}$ );  $EC$  is the instantaneous electrical conductivity measured in the stream ( $\mu\text{S cm}^{-1}$ ); and  $EC_{OF}$  and  $EC_{GW}$  are the electrical conductivity values in overland flow and groundwater ( $\mu\text{S cm}^{-1}$ ).  $EC_{OF}$  was measured in samples of overland flow collected at the soil surface on hillslopes draining to the stream during the rainfall event (Ribolzi et al., 2018). Because groundwater is supplied to the stream during interstorm flow periods,  $EC_{GW}$  was approximated from stream measurements at the beginning of the flood event.

64

65 **Text S3. *E. coli* concentration monitoring and laboratory analysis**

66         The *E. coli* concentration was monitored at the gauging and sampling station by  
67 collecting stream water samples (500 mL) in clean plastic bottles during both base flow  
68 and stormflow events with an average frequency of 15 d. However, this sampling frequency  
69 was not consistent over the 8 years, which led to a discontinuous time-series of *E. coli*  
70 concentration. The water samples were kept in a cool box, and their analysis was carried  
71 out within 24 h of collection.

72         To measure the *E. coli* concentration, we used the standardized microplate method  
73 (ISO 9308–3). Each sample was incubated at four dilution rates (1:2, 1:20, 1:200, and  
74 1:2000) in a 96-well microplate (MUG/EC, Biokar Diagnostics) for 48 h at 44 °C. Then,  
75 the Ringers' Lactate solution was used for dilution, and one plate was used for each sample.  
76 We then noted the number of positive wells for each microplate. The Poisson distribution  
77 was used to calculate the most probable number (MPN) per 100 mL. This microplate  
78 method has been successfully applied in other studies in the northern Lao PDR ([Ribolzi et](#)  
79 [al., 2016; Kim et al., 2017](#)).

80         Similar to grab sampling, we collected samples of stream water at the monitoring  
81 station using clean plastic bottles and an automatic sampler (Automatic Pumping Type  
82 Sediment Sampler, ICRISAT) for the measurement of *E. coli* concentration during 11 flood  
83 events. The automatic sampler was triggered by the water level recorder to collect water  
84 after every 2 cm of water-level change during the rising of the flood and after every 5 cm  
85 of water level change during recession.

86

#### Text S4. Sensitivity analysis and optimization

During calibration processes, it is difficult to optimize a large number of parameters, so we conducted a sensitivity analysis to determine which parameters affect the model output the most. We used Python's open-source library, "SALib" (Herman and Usher, 2017), to implement the method of Morris, namely, one-at-a-time (OAT) (Morris, 1991). We used 13 PERLND-associated parameters (Table S1) for each land use for sensitivity analysis. As our catchment included four land uses, the total number of parameters was 52. SALib performed a sensitivity analysis by varying one variable at one time while keeping all other variables constant. This process was repeated for all variables, and the model output was recorded for each run. The model response in our case was the MSE value between the simulated and predicted surface and subsurface flow. This method of Morris, which is called the OAT method, has been used in many hydrological studies for sensitivity analysis (van Griensvan et al., 2006; Baek et al., 2017; Cho et al., 2012). These parameters were then ranked according to their sensitivity.

After sensitivity analysis, we calibrated the most sensitive parameters using the truncated Newton algorithm (Nash, 1984) provided by the Scipy library (Jones et al., 2001) of the Python programming language. During calibration, we optimized the model parameters. The optimization we chose uses gradient information and optimized the parameters between specific bounds. The bounds for all parameters are given in Table S2 and were taken from the literature (USEPA, 2000). The optimized values obtained after calibration are given in Table 3 in the manuscript.

We also conducted optimization based on different objective functions. We used MSE and NSE calculated for simulated surface flow as well as for subsurface flow as an

110 objective function. During these optimization scenarios, the parameters of the HSPF, which  
111 control the surface and subsurface flow, were optimized.  
112

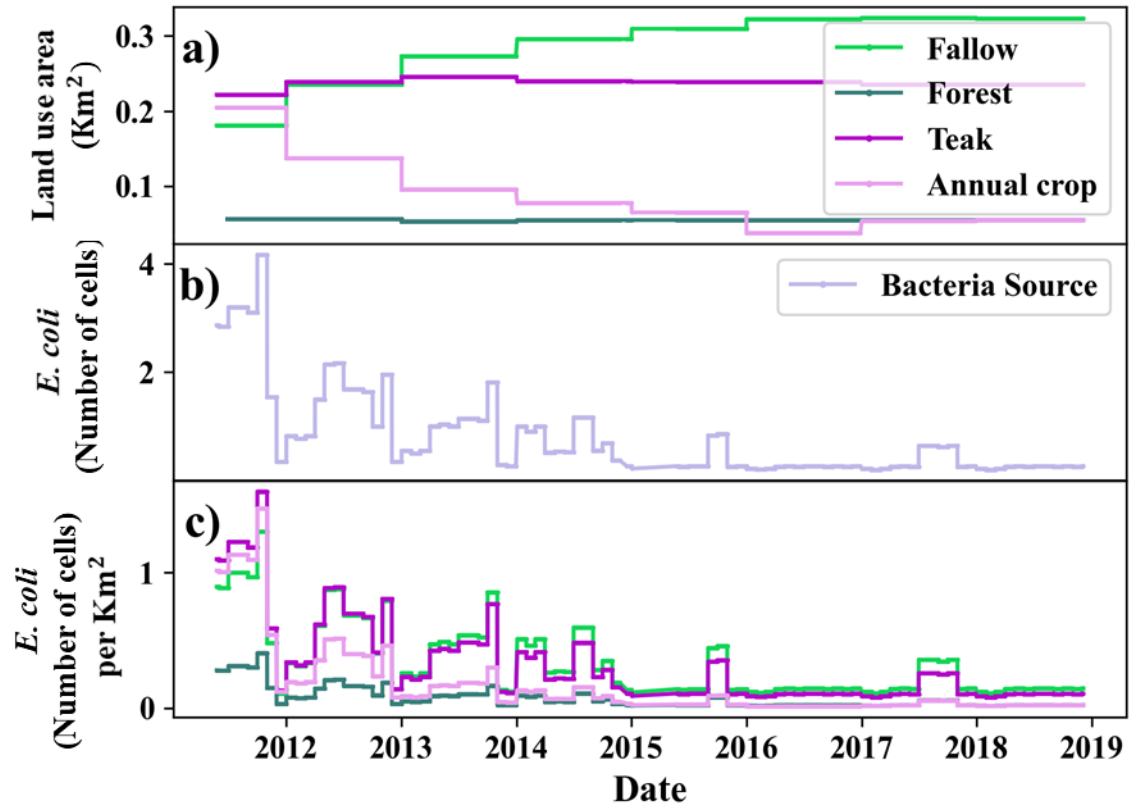

**Figure S1:** Land-use change and bacteria source from 2011 to 2018 in the Houay Pano catchment, northern Lao PDR: (a) Land-use change, (b) Monthly variation of bacteria source, and (c) *E. coli* source for each land use.

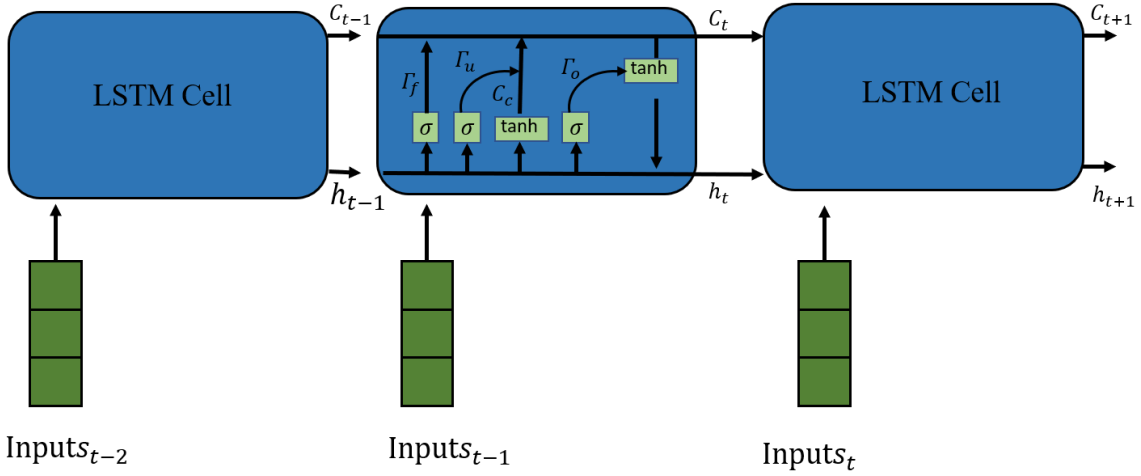

**Figure S2:** Description of an LSTM layer. An LSTM layer consists of LSTM cells which process information at one time step and generates cell state ( $c_t$ ) and hidden state ( $h_t$ ) which are fed to the next LSTM cell. The hidden state is considered as output. The LSTM cell consists of “forget” gate, “update” gate, and “output” gate.  $\sigma$  and  $\tanh$  represent sigmoid and hyperbolic tangent nonlinearities



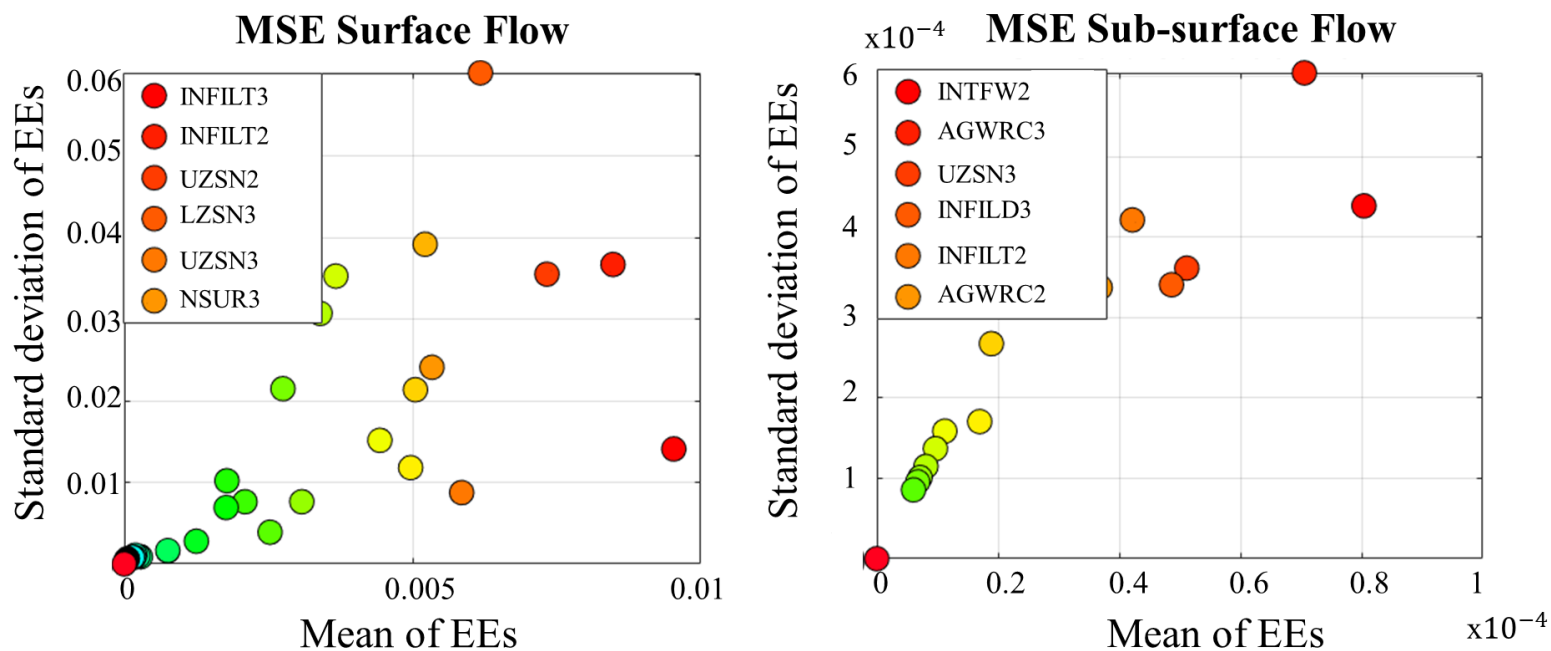

127

128 **Figure S3:** LH-OAT sensitivity analysis of hydrology parameters in HSPF. EEs

129 represent elementary effects. Details of abbreviations are given in Table S1. Boxes in

130 each plot show the five most sensitive parameters. Numbers in legends represent land

131 use; 1: Forest, 2: Teak, 3: Fallow, and 4: Annual crop.

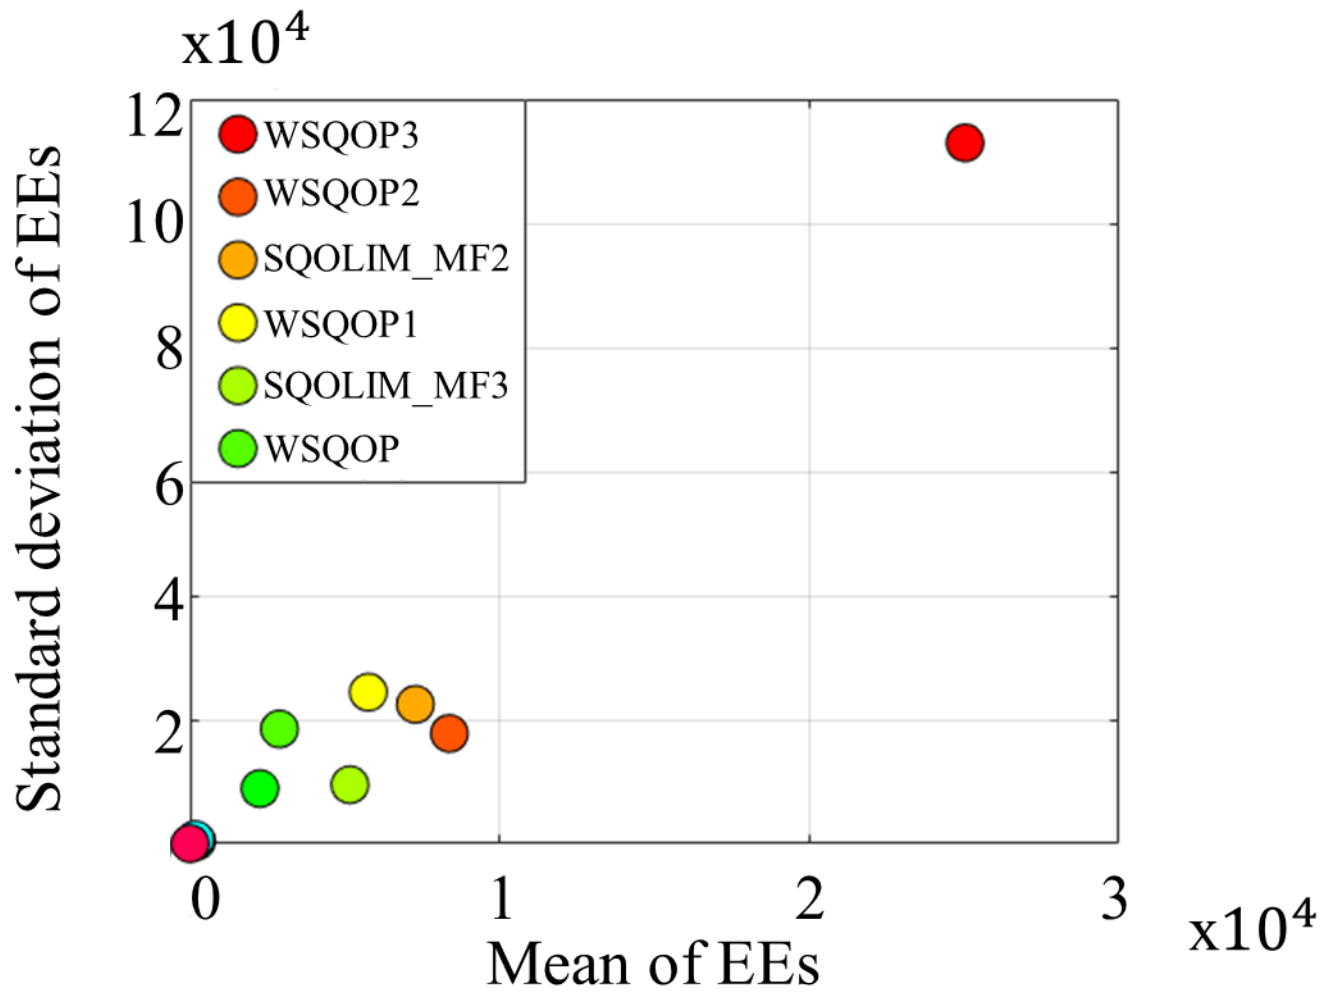

**Figure S4:** LH-OAT sensitivity analysis of *E. coli* parameters in HSPF. EEs represent elementary effects. Details of abbreviations are given in Table S1. Boxes in each plot show the five most sensitive parameters. Numbers in legends represent land use; 1: Forest, 2: Teak, 3: Fallow, and 4: Annual crop.

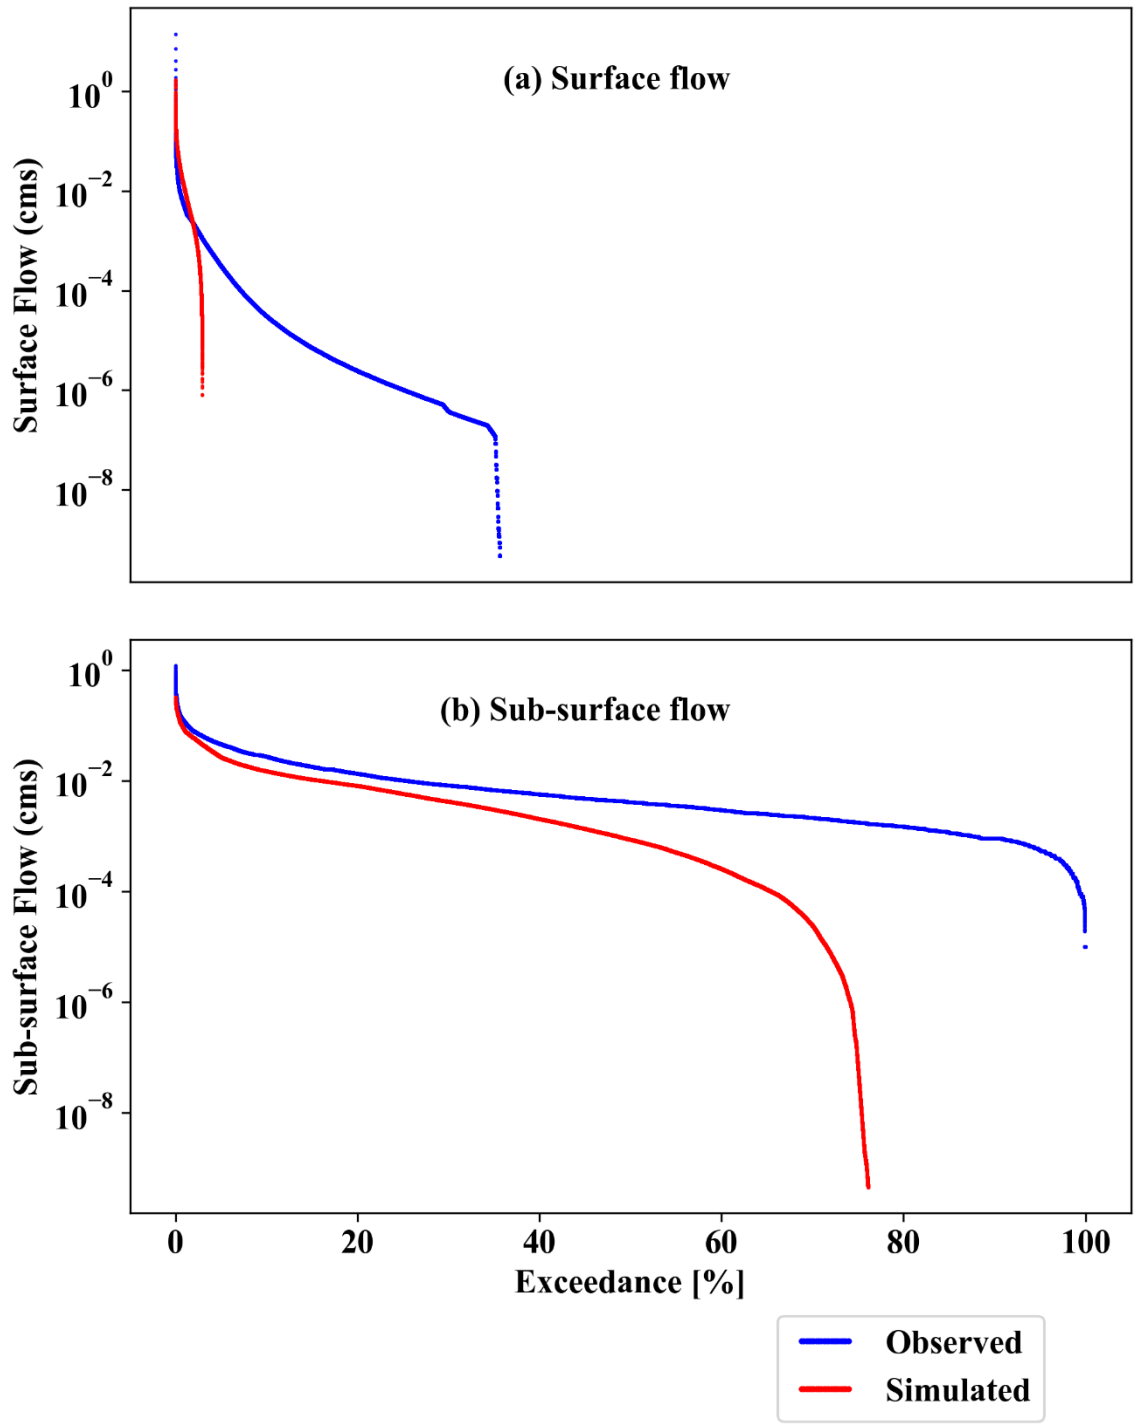

140 **Figure S5:** Flow duration curve for surface flow and subsurface flow from HSPF.

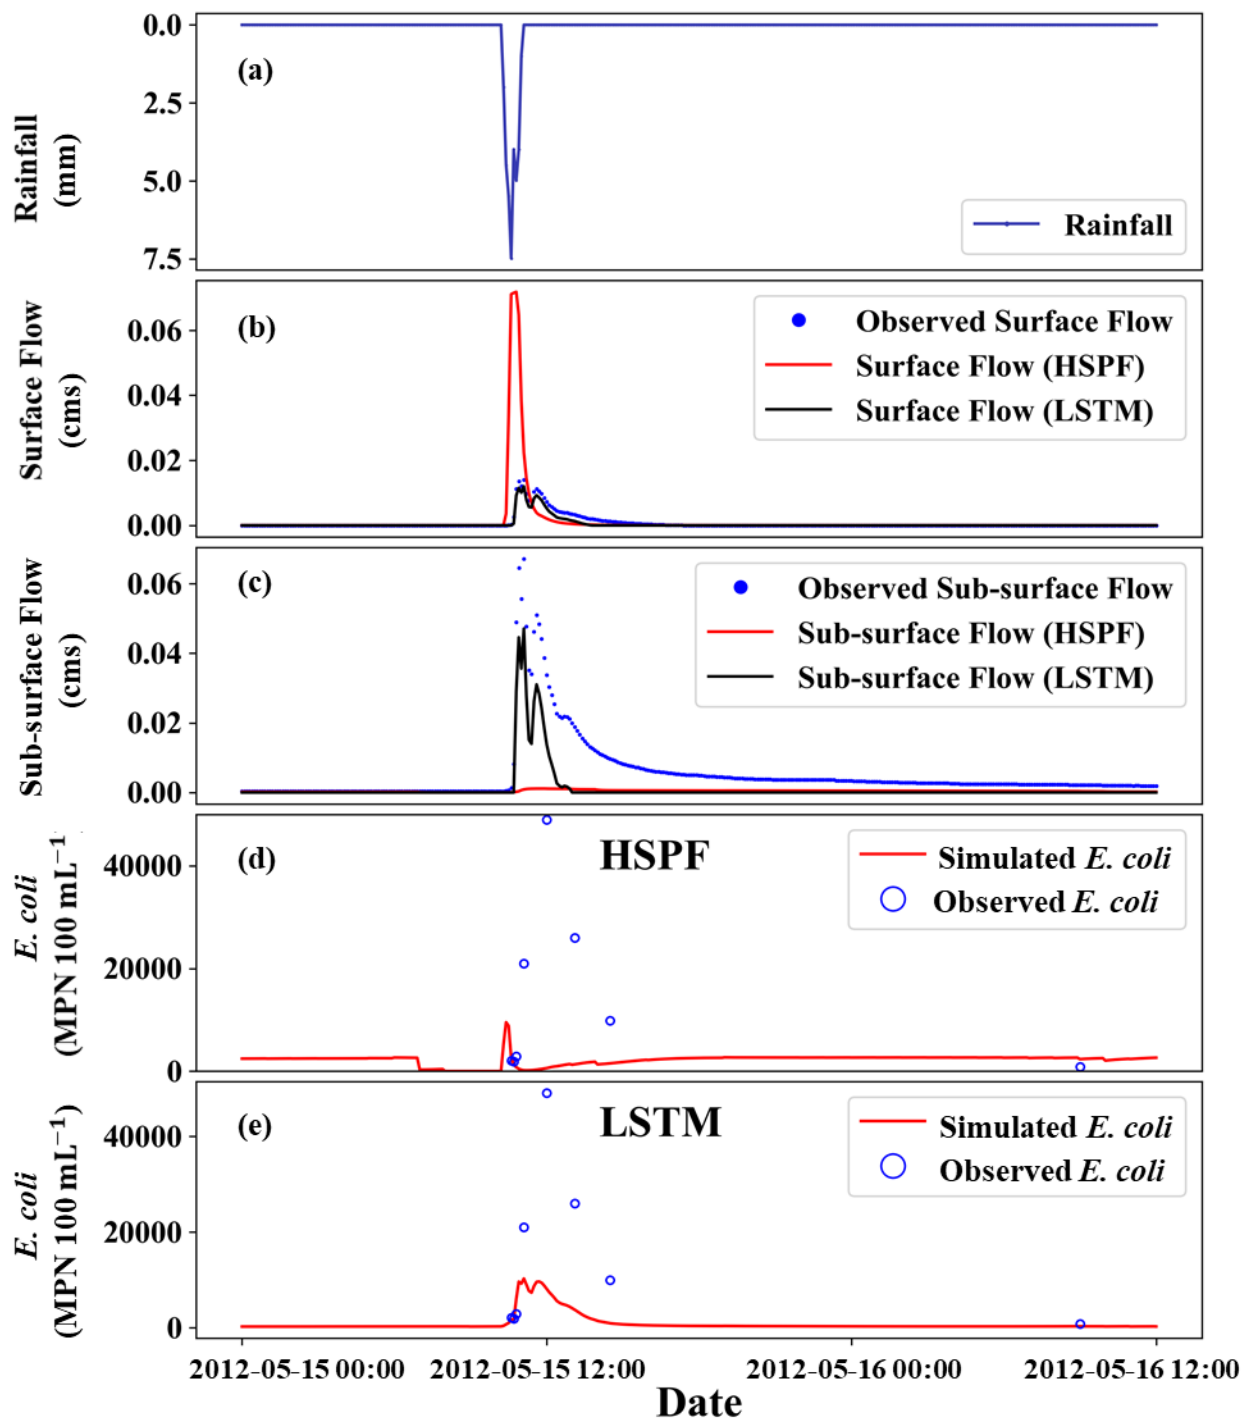

**Figure S6:** *E. coli* concentration of HSPF and LSTM on May 15, 2012. (a) Observed rainfall, (b) Simulated and observed surface flow, (d) Simulated *E. coli* from HSPF, and (d) Simulated *E. coli* from LSTM.

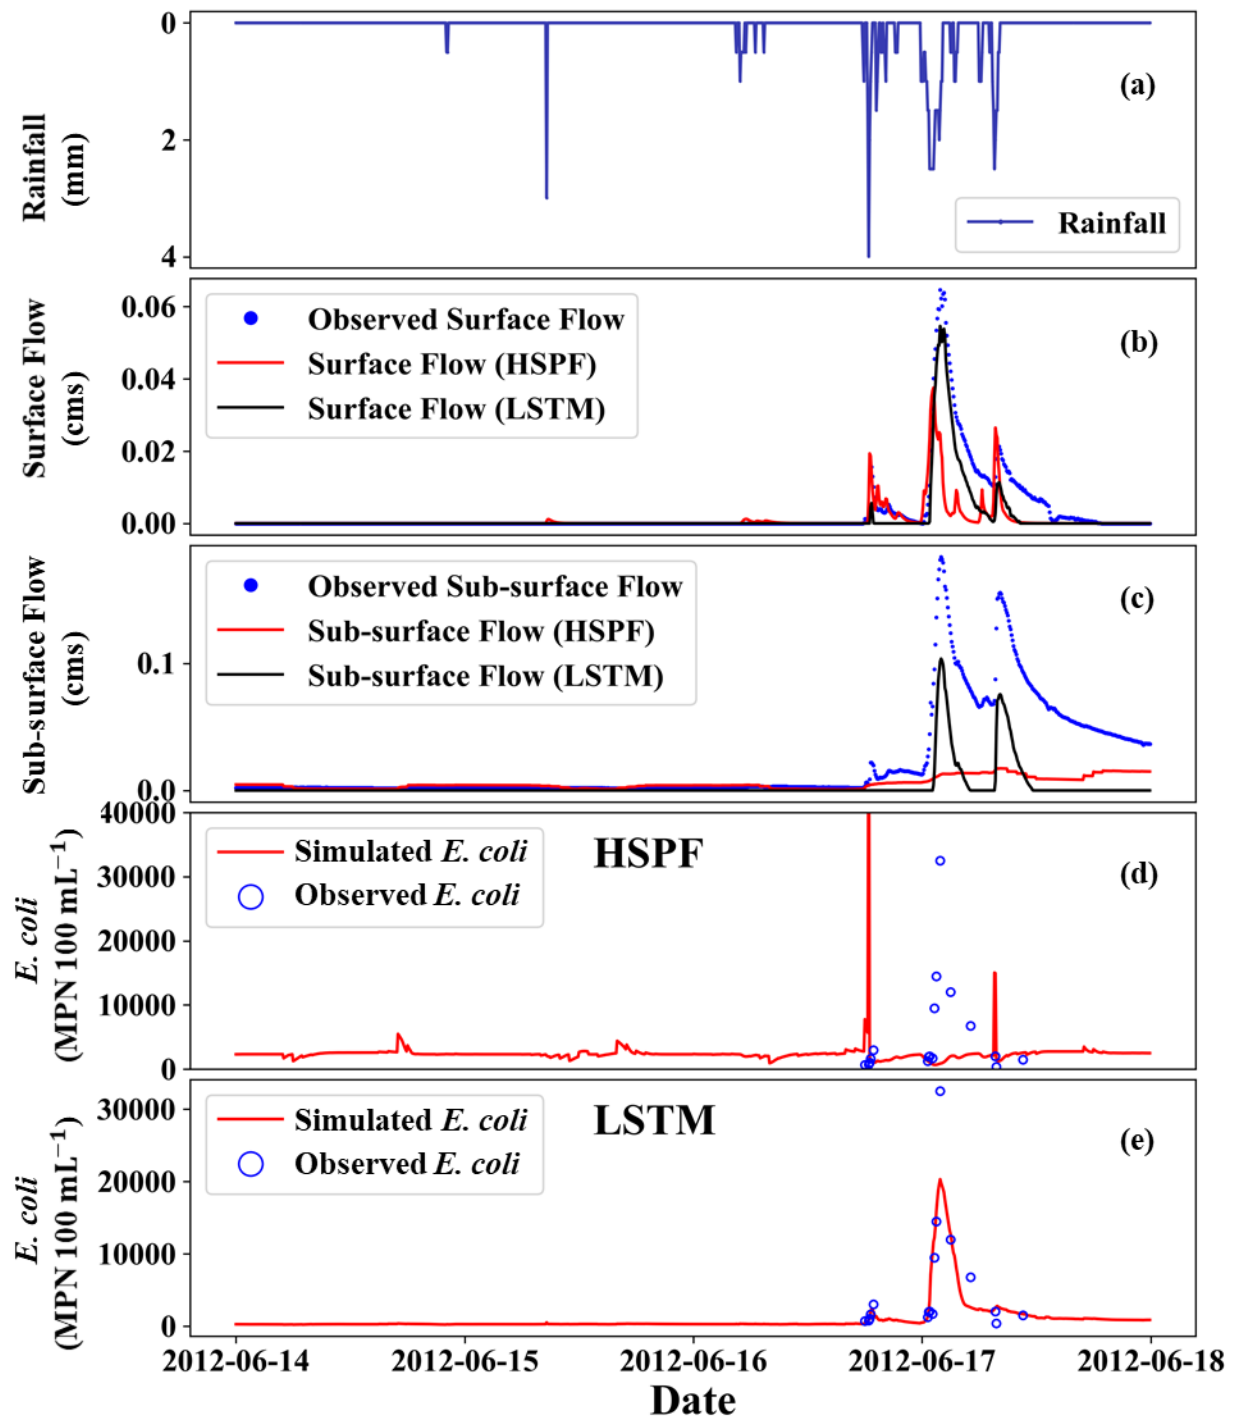

**Figure S7:** *E. coli* concentration of HSPF and LSTM on June 14, 2012. (a) Observed rainfall, (b) Simulated surface flow, (c) Simulated subsurface flow, (d) Simulated *E. coli* from HSPF, and (d) Simulated *E. coli* from LSTM.

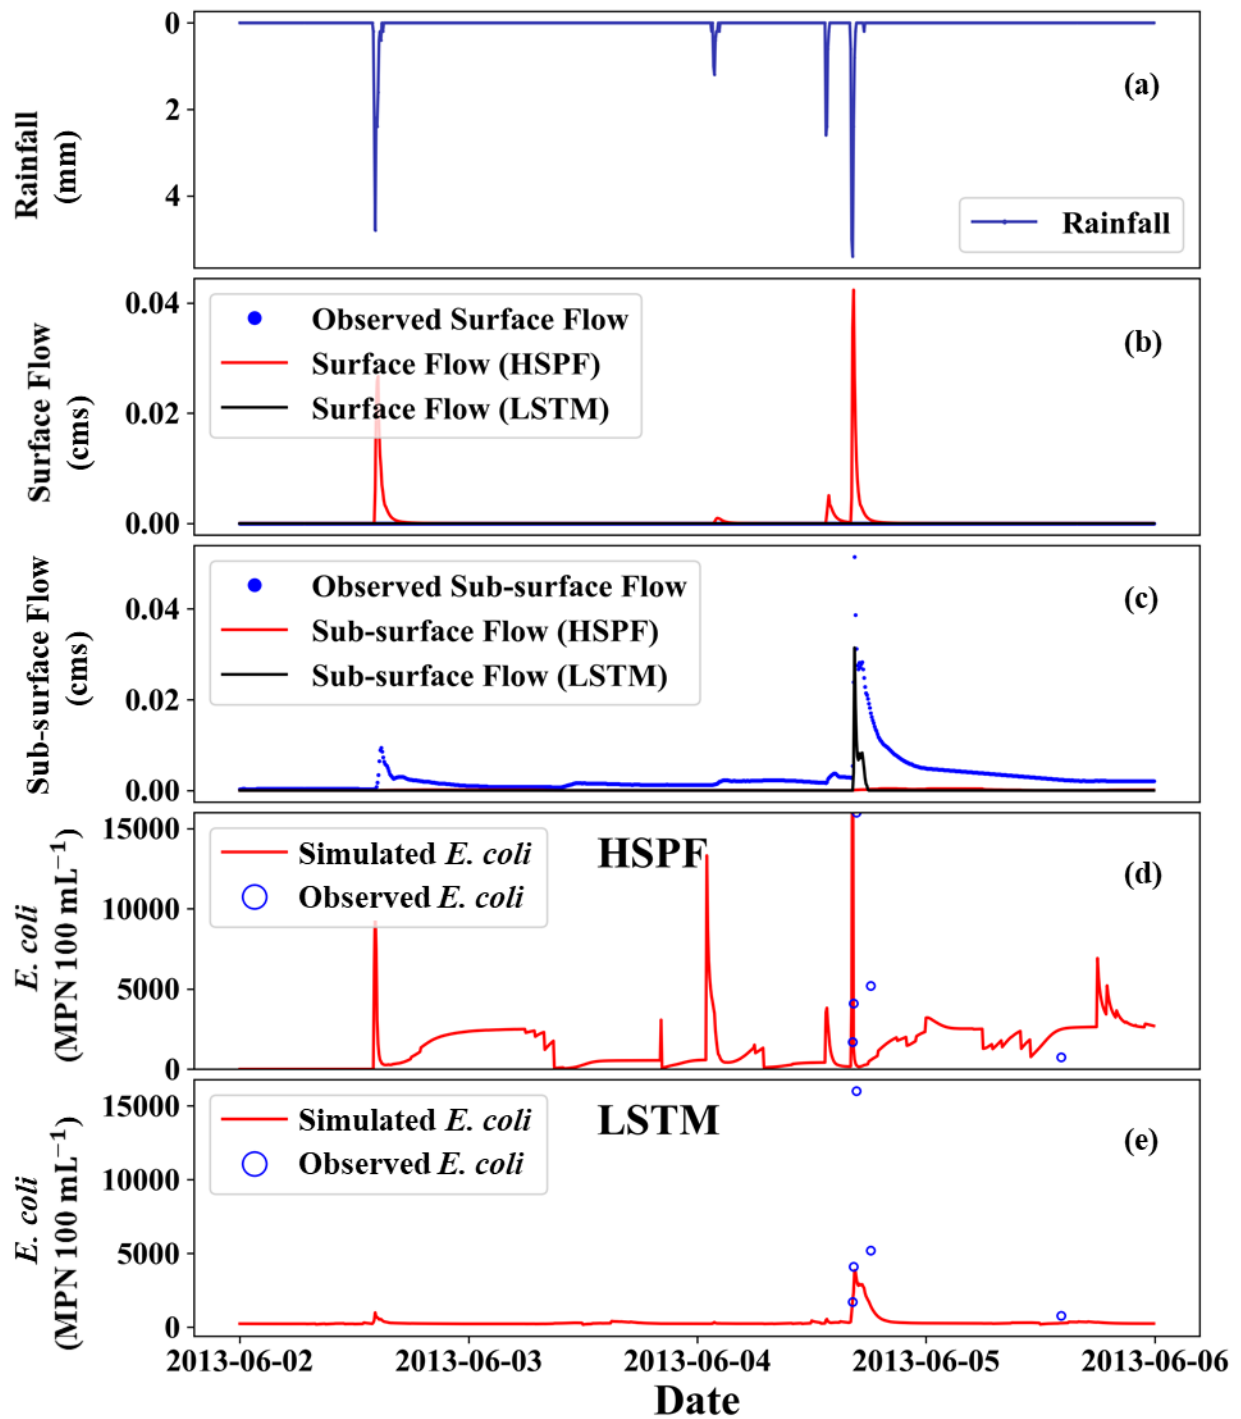

**Figure S8.** *E. coli* concentration of HSPF and LSTM on June 02, 2013. (a) Observed rainfall, (b) Simulated surface flow, (c) Simulated subsurface flow, (d) Simulated *E. coli* from HSPF, and (e) Simulated *E. coli* from LSTM.

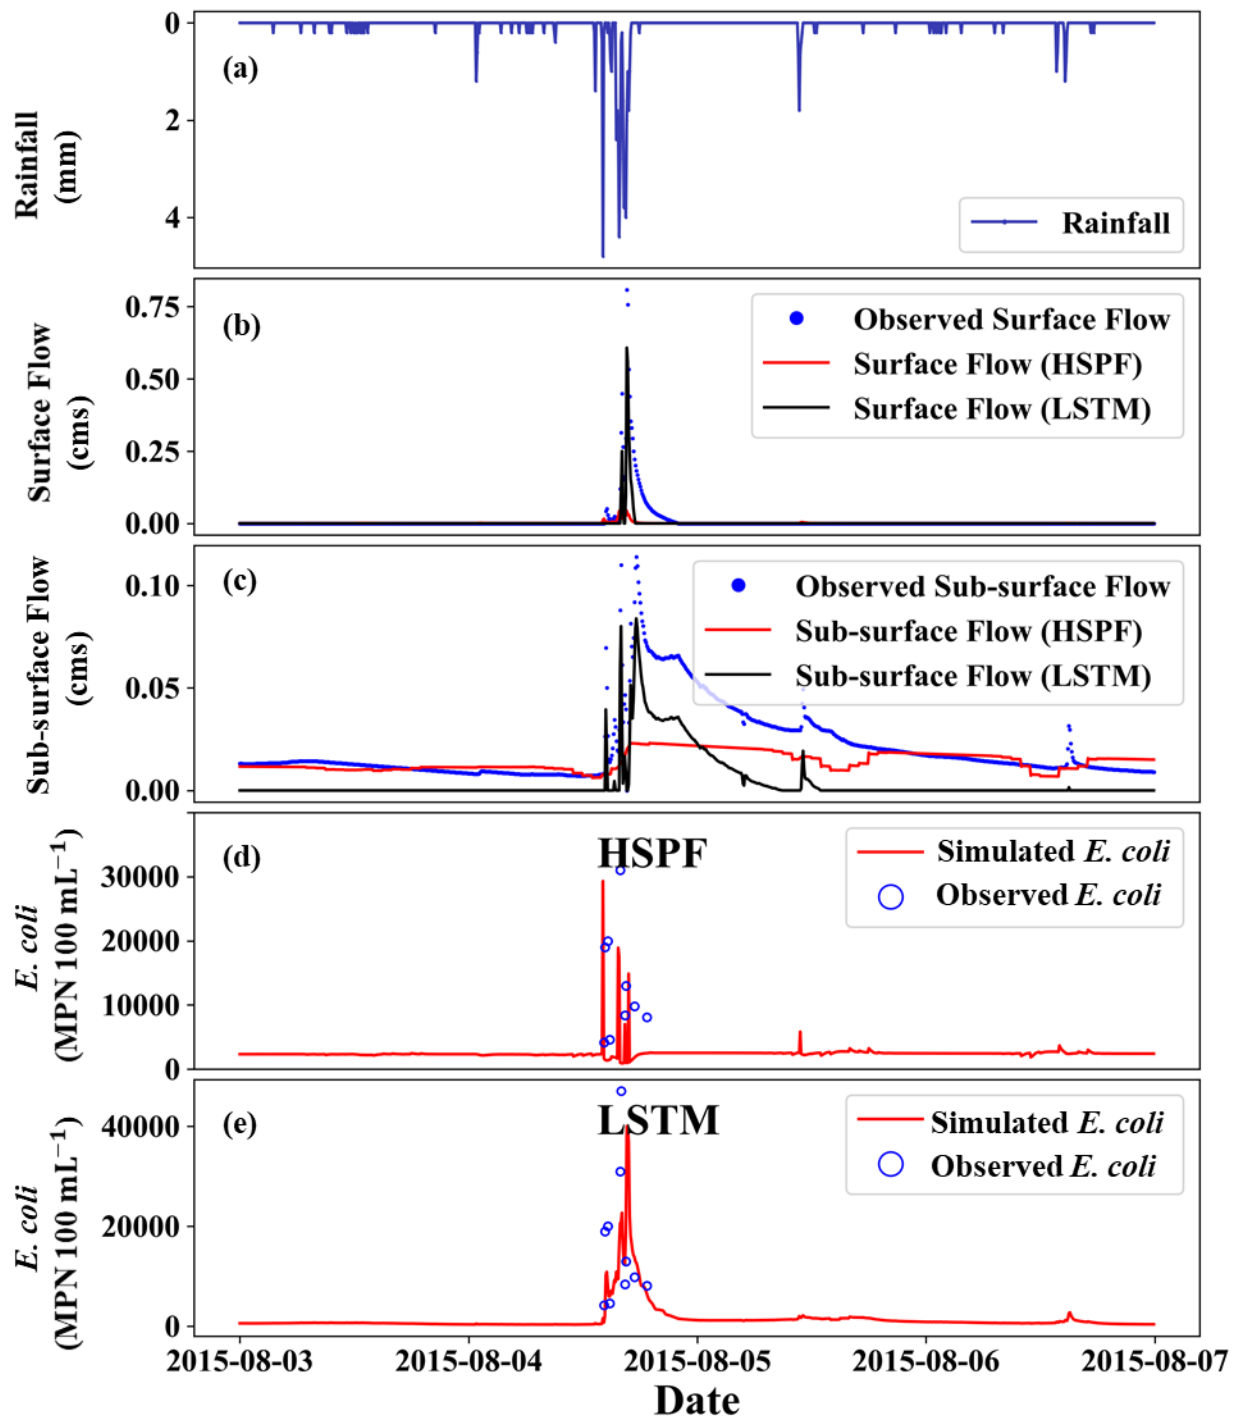

**Figure S9:** *E. coli* concentration of HSPF and LSTM on August 03, 2015. (a) Observed rainfall, (b) Simulated surface flow, (c) Simulated subsurface flow, (d) Simulated *E. coli* from HSPF, and (e) Simulated *E. coli* from LSTM.

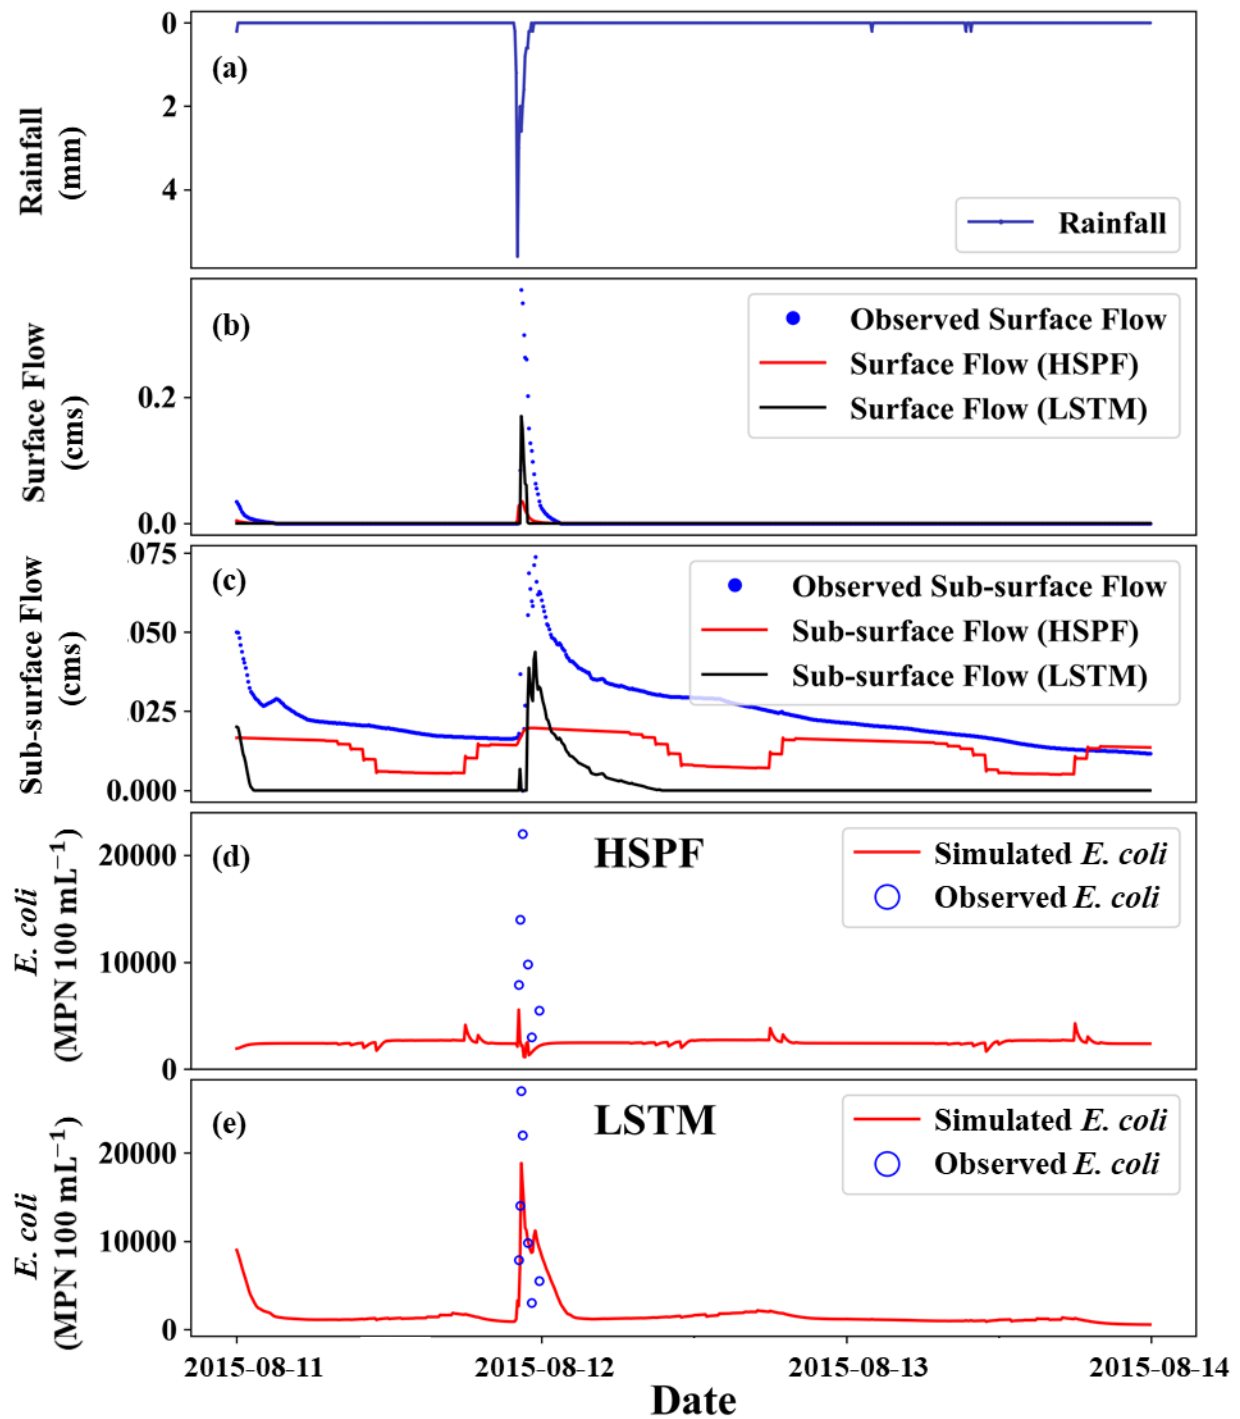

**Figure S10:** *E. coli* concentration of HSPF and LSTM on August 11, 2015. (a) Observed rainfall, (b) Simulated surface flow, (c) Simulated subsurface flow, (d) Simulated *E. coli* from HSPF, and (e) Simulated *E. coli* from LSTM.



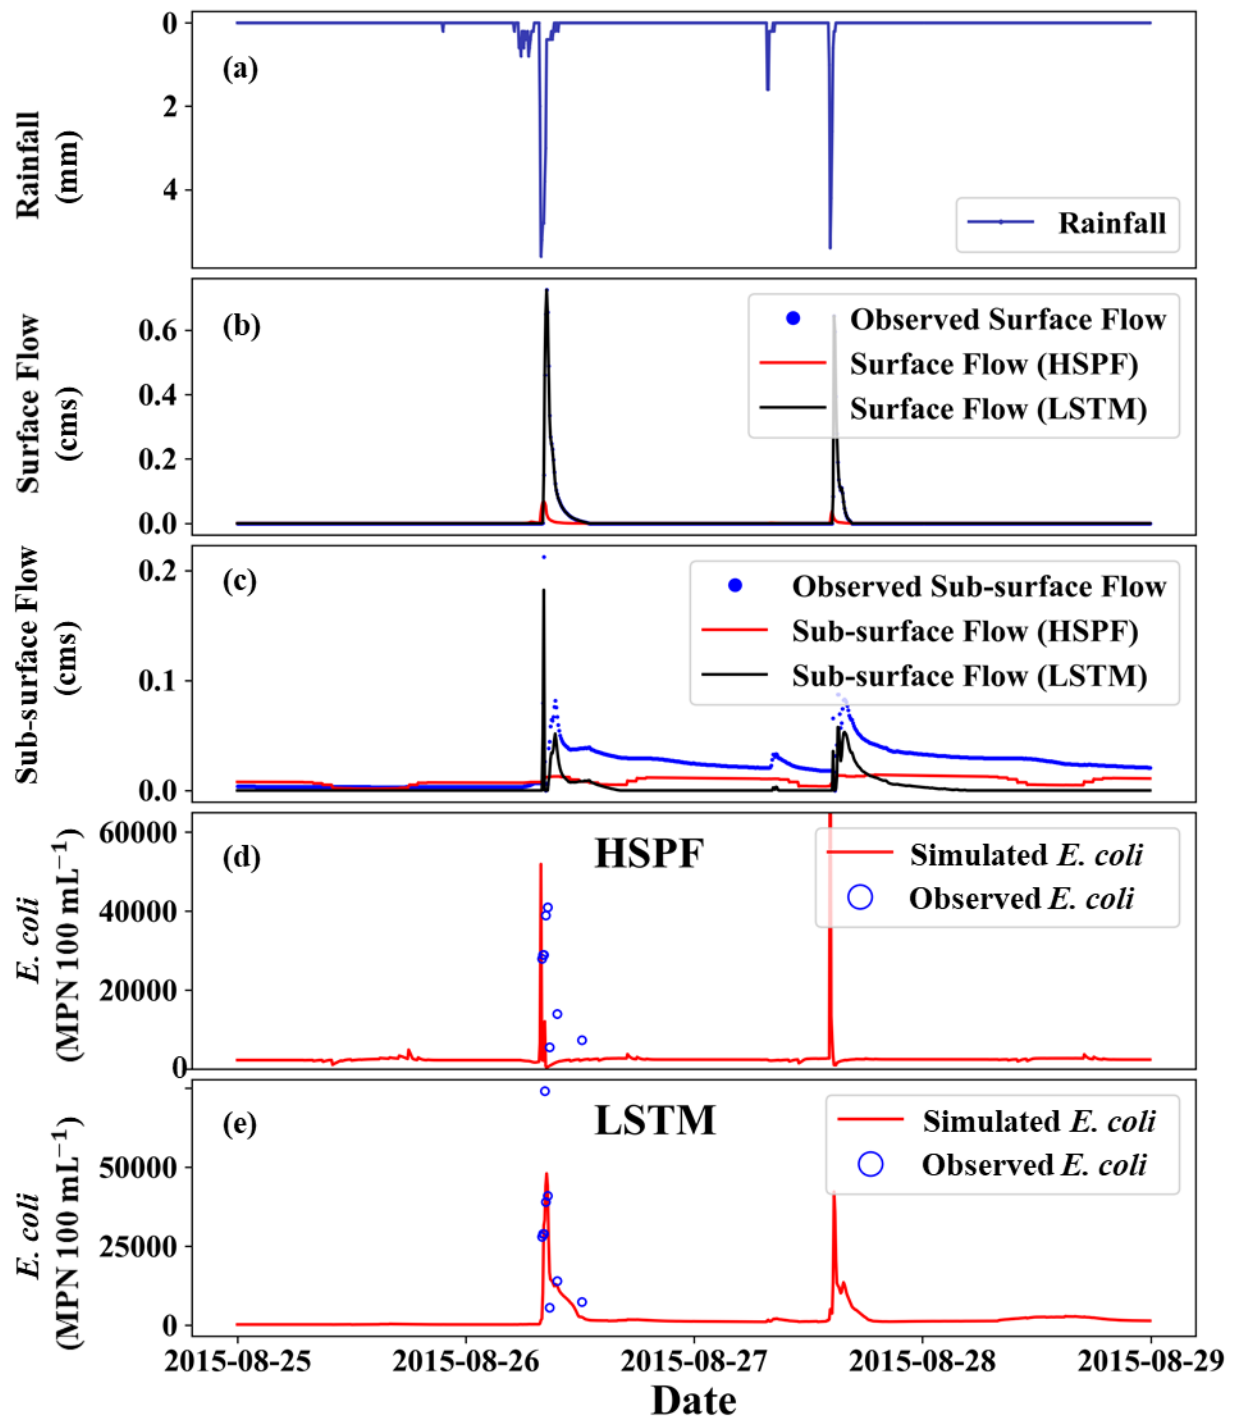

**Figure S11:** *E. coli* concentration of HSPF and LSTM on August 25, 2015. (a) Observed rainfall, (b) Simulated surface flow, (c) Simulated subsurface flow, (d) Simulated *E. coli* from HSPF, and (d) Simulated *E. coli* from LSTM.

165 **Table S1** Abbreviations of HSPF parameters

| Abbreviation | Detailed Name                                                                                           |
|--------------|---------------------------------------------------------------------------------------------------------|
| INFILT       | Index to mean soil infiltration rate (inches/hour)                                                      |
| UZSN         | Upper zone soil moisture storage (inches)                                                               |
| LZSN         | Lower zone soil moisture storage (inches)                                                               |
| NSUR         | Manning's n for overland flow plane                                                                     |
| INFTFW       | Interflow inflow parameter                                                                              |
| INFILD       | Ratio of max/mean infiltration capacities                                                               |
| BASETP       | Fraction of remaining evapotranspiration from baseflow                                                  |
| DEEPFR       | Fraction of groundwater inflow to deep recharge                                                         |
| AGWETP       | Fraction of remaining evapotranspiration from active groundwater                                        |
| AGWRC        | Base groundwater recession                                                                              |
| FSTDEC       | first-order decay rate for <i>E. coli</i>                                                               |
| THFST        | Temperature Correction Coefficient for first-order decay of <i>E. coli</i>                              |
| SQOLIM       | The maximum storage <i>E. coli</i> in the surface flow                                                  |
| WSQOP        | the rate of surface flow that will remove 90 percent of stored <i>E. coli</i> in surface flow per hour. |
| ACQOP        | the rate of accumulation of <i>E. coli</i> in surface flow.                                             |
| AOQC         | Concentration of <i>E. coli</i> in active groundwater flow                                              |
| IOQC         | Concentration of <i>E. coli</i> in Interflow                                                            |

166

167

168

169 **Table S2** Sensitivity ranking of HSPF parameters for surface and subsurface flow with respect to  
 170 Mean Square Error. Numbers represent land-use; 1: Forest, 2: Teak, 3: Fallow, and 4: Annual  
 171 crop

| Rank | Surface Flow | Subsurface flow |
|------|--------------|-----------------|
| 1    | INFILT3      | INTFW2          |
| 2    | INFILT2      | AGWRC3          |
| 3    | UZSN2        | UZSN3           |
| 4    | LZSN3        | INFILD3         |
| 5    | UZSN3        | INFILT2         |
| 6    | NSUR3        | AGWRC2          |
| 7    | LZSN2        | UZSN2           |
| 8    | INFILT4      | INFILT3         |
| 9    | INTFW3       | INTFW3          |
| 10   | INTFW2       | INFILT4         |
| 11   | LZSN4        | NSUR3           |
| 12   | INFILD4      | UZSN4           |
| 13   | NSUR2        | INFILD2         |
| 14   | NSUR4        | INTFW1          |

|           |         |         |     |
|-----------|---------|---------|-----|
| <b>15</b> | UZSN4   | DEEPFR2 | 172 |
| <b>16</b> | INFILD3 | LZSN1   |     |
| <b>17</b> | INFILD2 | LZSN2   |     |
| <b>18</b> | INTFW4  | LZSN3   |     |
| <b>19</b> | INFILT1 | LZSN4   |     |
| <b>20</b> | INTFW1  | INFILT1 |     |
| <b>21</b> | UZSN1   | AGWRC1  |     |
| <b>22</b> | NSUR1   | AGWRC4  |     |
| <b>23</b> | LZSN1   | INFILD4 |     |
| <b>24</b> | BASETP3 | DEEPFR1 |     |
| <b>25</b> | BASETP2 | DEEPFR3 |     |

---

173 **Table S3** Sensitivity ranking of HSPF parameters for *E. coli* simulation with respect to Mean  
 174 Square Error. Number in parameter represents land-use; 1: Forest, 2: Teak, 3: Fallow, and 4:  
 175 Annual crop

| Rank | Parameter  |
|------|------------|
| 1    | WSQOP3     |
| 2    | WSQOP2     |
| 3    | SQOLIM_MF2 |
| 4    | WSQOP1     |
| 5    | SQOLIM_MF3 |
| 6    | WSQOP4     |
| 7    | SQOLIM_MF1 |
| 8    | FSTDEC     |
| 9    | THFST      |
| 10   | SQOLIM_MF4 |
| 11   | AOQC4      |
| 12   | AOQC2      |
| 13   | AOQC3      |
| 14   | AOQC1      |
| 15   | IOQC3      |
| 16   | IOQC2      |
| 17   | IOQC4      |
| 18   | IOQC1      |

176

## References

- Collins, R., and Neal, C.: The hydrochemical impacts of terraced agriculture, Nepal. *Science of the total environment*, 212(2-3), 233-243, 1998.
- Hochreiter, S., and Schmidhuber, J.: Long short-term memory. *Neural computation*, 9(8), 1735-1780, 1997.
- Moriasi, D. N., Arnold, J. G., Van Liew, M. W., Bingner, R. L., Harmel, R. D., and Veith, T. L.: Model evaluation guidelines for systematic quantification of accuracy in watershed simulations. *Transactions of the ASABE*, 50(3), 885-900, 2007.
- QGIS Development Team.: QGIS geographic information system. *Open source geospatial foundation project*, 2016.
- Ribolzi, O., Evrard, O., Huon, S., De Rouw, A., Silvera, N., Latsachack, K. O., ... and Sengtaheuanghoung, O.: From shifting cultivation to teak plantation: effect on overland flow and sediment yield in a montane tropical catchment. *Scientific Reports*, 7(1), 1-12. <https://doi.org/10.1038/s41598-017-04385-2>, 2017.
- Ribolzi, O., Lacombe, G., Pierret, A., Robain, H., Sounyafong, P., De Rouw, A., ... and Latxachak, K. O.: Interacting land use and soil surface dynamics control groundwater outflow in

200 a montane catchment of the lower Mekong basin. *Agriculture, Ecosystems & Environment*, 268,  
201 90-102. <https://doi.org/10.1016/j.agee.2018.09.005>, 2018.

202

203

204 Waseem, M., Mani, N., Andiego, G., and Usman, M.: A review of criteria of fit for hydrological  
205 models. *International Research Journal of Engineering and Technology (IRJET)*, 4(11), 1765-  
206 1772, 2017.
